# Explicit control of step timing during split-belt walking reveals interdependent recalibration of movements in space and time

Marcela Gonzalez-Rubio<sup>1</sup>, Nicolas F. Velasquez<sup>1</sup>, and Gelsy Torres-Oviedo<sup>\*1</sup>

<sup>1</sup> *University of Pittsburgh, Department of Bioengineering, Pittsburgh, PA, USA*

Correspondence\*:  
Gelsy Torres-Oviedo  
gelsyto@pitt.edu

## 2 ABSTRACT

3 Split-belt treadmills that move the legs at different speeds are thought to update internal  
4 representations of the environment, such that this novel condition generates a new locomotor  
5 pattern with distinct spatio-temporal features compared to those of regular walking. It is unclear  
6 the degree to which such recalibration of movements in the spatial and temporal domains  
7 is interdependent. In this study, we explicitly altered subjects' limb motion in either space or  
8 time during split-belt walking to determine its impact on the adaptation of the other domain.  
9 Interestingly, we observed that motor adaptation in the spatial domain was susceptible to altering  
10 the temporal domain, whereas motor adaptation in the temporal domain was resilient to modifying  
11 the spatial domain. This nonreciprocal relation suggests a hierarchical organization such that the  
12 control of timing in locomotion has an effect on the control of limb position. This is of translational  
13 interest because clinical populations often have a greater deficit in one domain compared to  
14 the other. Our results suggest that explicit changes to temporal deficits cannot occur without  
15 modifying the spatial control of the limb.

16 **Keywords:** locomotion, motor learning, split-belt, spatio-temporal, sensorimotor adaptation, kinematics

## 1 INTRODUCTION

17 We are constantly adapting our movements to demands imposed by changes in the environment or our body.  
18 In walking, this requires the adaptation of spatial and temporal gait features to control "where" and "when"  
19 we step, respectively. Particularly, in split-belt walking when one leg moves faster than the other, it has  
20 been observed that subjects minimize spatial and temporal asymmetries by adopting motor patterns specific  
21 to the split environment (e.g., Malone et al., 2012). It is thought that this is achieved by updating internal  
22 representations of the treadmill for the control of the limb in space and time (Malone et al., 2012). There is  
23 a clinical interest in understanding the interdependence in the control of these two aspects of movement  
24 because pathological gait often has a greater deficiency in one domain compared to the other (Finley et al.,  
25 2015; Malone and Bastian, 2014). Thus, there is a translational interest to determine if spatial and temporal  
26 asymmetries in clinical populations can be targeted and treated independently.

27 Ample evidence supports that the adaptation, and hence control, of spatial and temporal gait features  
28 is dissociable. Notably, studies have shown that inter-limb measures such as step timing (temporal) and  
29 step position (spatial) adapt at different rates (Sombric et al., 2017; Malone and Bastian, 2010), they  
30 exhibit different generalization patterns (Torres-Oviedo and Bastian, 2010), and follow distinct adaptation  
31 dynamics throughout development (Vasudevan et al., 2011; Patrick et al., 2014) or healthy aging (Sombric

et al., 2017). In addition, several behavioral studies show that subjects' adjustment of spatial metrics can be altered (Malone and Bastian, 2010; Malone et al., 2012; Long et al., 2016) without modifying the adaptation of temporal gait features. However, the opposite has not been demonstrated. For example, altering intra-limb measures (i.e., characterizing single leg motion) of timing such as stance time duration (Afzal et al., 2015; Krishnan et al., 2016) also leads to changes in intra-limb spatial features such as stride lengths. In sum, the spatial and temporal control of the limb is thought to be dissociable, but it remains unclear if the adaptation of internal representations of timing can be altered and what is the impact of such manipulation in the temporal domain on the spatial control of the limb.

In this study we aimed to determine the interdependence between the spatial and temporal control of the limbs during walking, particularly of inter-limb parameters characterizing bipedal coordination. We hypothesized that spatial and temporal inter-limb features are adapted independently based on previous studies demonstrating their dissociation. To test this hypothesis, subjects walked on a split-belt treadmill, which requires the adaptation of spatial and temporal inter-limb coordination. We further altered subjects' movements during split-belt walking by either instructing them "where" (spatial feedback) or "when" (temporal feedback) to take a step. We contrasted the impact of explicitly manipulating movements in one domain on the adaptation of the other domain to determine their interdependence.

## 2 MATERIAL AND METHODS

We recruited twenty-one healthy young subjects (13 women, 8 men, mean age  $24.69 \pm 4$  years) to voluntarily participate in this study. Subjects were randomly assigned to three groups ( $n=7$ , each): 1) control, 2) spatial feedback, 3) temporal feedback to determine if explicitly altering the limb motion on either the spatial or the temporal domain with visual feedback during split-belt walking had an impact on the adaptation of the other domain (Figure 1A). Notably, if the control of these two domains was dissociable, altering one would not have an effect on the other. Alternatively, if they were interdependent, modifying the adaptation of one domain not only would have an effect on the targeted domain, but will also alter the other one. The protocol was approved by the Institutional Review Board of the University of Pittsburgh and all subjects gave informed consent prior to testing.

### 2.1 Experimental Protocol

All subjects walked on a split-belt treadmill during four experimental phases: Baseline, Familiarization, Adaptation, and Post-adaptation. The speed for each belt during these phases is shown in Figure 1B. This speed profile enabled individuals to walk at an averaged speed of 0.75 m/s throughout the experiment. In the Baseline phase, individuals walked with the two belts moving at the same speed of 0.75 m/s for 150 strides ( $\sim 3$  min). Recordings from these phase were used as the reference gait for every individual. In the Familiarization phase, all participants also walked at 0.75 m/s for 150 strides, but only subjects in the feedback groups received the same visual feedback that they were going to experience during the subsequent Adaptation phase. This was done to allow feedback groups to become habituated to use the provided visual feedback to control either spatial (spatial feedback group) or temporal (temporal feedback group) gait features. In the Adaptation phase, the belts were moved at a 2:1 ratio (1:0.5 m/s) for 600 strides ( $\sim 13$  min). We selected these specific belt speeds because other studies have indicated that they induce robust sensorimotor adaptation (Reisman et al., 2005; Mawase et al., 2014; Sombric et al., 2017; Vervoort et al., 2019) and we observed in pilot tests that subjects with visual feedback at these speeds could successfully modify the spatial and temporal gait features of interest. The self-reported dominant leg walked on the fast belt. In the Post-adaptation phase, all individuals walked with both belts moving at 0.75

73 m/s for 450 strides ( $\sim 10$  min). This phase was used to quantify gait changes following the Adaptation  
74 phase. The treadmill belts were stopped at the end of each experimental phase. A handrail was placed in  
75 front of the treadmill for safety purposes, but individuals did not hold it while walking. A custom-built  
76 divider was placed in the middle of the treadmill during the entire experimental protocol to prevent subjects  
77 from stepping on the same belt with both legs. Subjects also wore a safety harness (SoloStep, SD) that did  
78 not interfere with their walking (no body weight support).

79 We tested three groups: 1) control group, 2) spatial feedback group, 3) temporal feedback group. The  
80 control group was asked to "just walk" without any specific feedback on subjects' movements. Each subject  
81 in the spatial or temporal feedback groups was instructed to either maintain his/her averaged baseline  
82 step position (spatial feedback group) or averaged baseline step time (temporal feedback group) when  
83 the feedback was on. Step position was defined as the sagittal distance between the leading leg's ankle  
84 to the hip at heel strike (Figure 1C). Step time was defined as the time period from heel strike (i.e., foot  
85 landing) of one leg to heel strike of the other leg (Figure 1D). We chose to manipulate step position and  
86 step time for consistency with other studies (Malone et al., 2012; Long et al., 2016) and because these  
87 parameters are adjusted during split-belt walking to reduce spatial and temporal inter-limb asymmetries,  
88 respectively (Malone et al., 2012). Panels C and D in Figure 1 show sample screen shots of the visual  
89 feedback observed by each group on a screen placed in front of them. More specifically, we permanently  
90 displayed either spatial or temporal targets (blue rectangles) indicating the averaged step position (spatial  
91 feedback group) or averaged step time (temporal feedback group) across legs during baseline walking.  
92 These targets turned green when subjects achieved the targeted baseline values and they turned red when  
93 they did not. A tolerance of  $\pm 0.75\%$  and  $\pm 1.25\%$  of the baseline value was given to subjects in the spatial  
94 and temporal feedback groups, respectively. Yellow lines indicated the actual step position and step time  
95 for each leg at every step. Thus, subjects could appreciate how far they were from the targeted spatial or  
96 temporal value at every step.

## 97 **2.2 Data Collection**

98 Kinetic and kinematic data were collected to quantify subjects' gait. Kinematic data was collected at  
99 100 Hz with a motion capture system (VICON motion systems, Oxford, UK). Passive reflective markers  
100 were placed bilaterally on bony landmarks at the ankle (malleolus) and the hip (greater trochanter). Kinetic  
101 data was collected at 1000 Hz with the instrumented split-belt treadmill (Bertec, OH). The normal ground  
102 reaction force ( $F_z$ ) was used to detect when the foot landed (i.e., heel strike) or was lifted off (i.e., toe off).  
103 A threshold of 10 N was used for detecting heel strikes and toe offs for data analysis, whereas a threshold  
104 of 30 N was used for counting strides in real-time.

## 105 **2.3 Data Analysis**

### 106 **2.3.1 Gait parameters**

107 We computed six gait parameters previously used (Malone et al., 2012) to quantify the adaptation of  
108 spatial and temporal control of the limb during split-belt walking:  $S_{out}$ ,  $T_{out}$ ,  $S_A$ ,  $T_A$ ,  $S_{nA}$ , and  $T_{nA}$ . We  
109 used  $S_{out}$  and  $T_{out}$  because our feedback was designed to directly alter these metrics. For example, subjects  
110 in the spatial feedback group were given feedback to maintain the same baseline step position in both  
111 legs.  $S_{out}$  is, therefore, a good metric of performance for the spatial feedback group since it quantifies  
112 the difference in step positions,  $\alpha_f$  and  $\alpha_s$ , when taking a step with the fast and slow leg, respectively.  
113 Formally expressed:

$$S_{out} = \frac{\alpha_f - \alpha_s}{\alpha_f + \alpha_s} \quad (1)$$

114  $\alpha_i$  is a length measurement that indicates the position of the ankle marker relative to the hip marker at  
115 heel strike. The subscript  $i$  can be either  $f$  or  $s$  for the leg that is on the fast belt or slow belt, respectively.  
116 By convention,  $S_{out}$  is positive when the fast leg's foot lands farther away from the body when taking a  
117 step than the slow leg's one (i.e.,  $\alpha_f > \alpha_s$ ).  $S_{out}$  is zero during baseline and subjects in the feedback group  
118 were instructed to maintain this value during split-belt walking.

119 Similarly, subjects in the temporal feedback group were given feedback to maintain the same baseline  
120 step times in both legs.  $T_{out}$  is, therefore, a good metric of performance for the temporal feedback group  
121 since it quantifies the difference in step times,  $t_s$  and  $t_f$ . Step time ( $t_s$ ) is defined as the time interval to  
122 take a step on the slow belt (i.e., duration from heel strike on the fast belt to the subsequent heel strike on  
123 the slow belt) and vice versa for  $t_s$ . Formally expressed:

$$T_{out} = \frac{t_s - t_f}{t_s + t_f} = \frac{t_s - t_f}{T_{stride}} \quad (2)$$

124 Where  $T_{stride}$  is the stride time (i.e., time interval between two consecutive heel strikes with the same  
125 leg). By convention,  $T_{out}$  is positive when the slow leg's step time is longer than the fast leg's one.  $T_{out}$   
126 is zero during baseline and subjects in the feedback group were instructed to maintain this value during  
127 split-belt walking. It has been previously shown that  $S_{out}$  and  $T_{out}$  are adapted during split-belt walking to  
128 minimize spatial and temporal baseline asymmetries defined as  $S_A$  and  $T_A$ , respectively (Malone et al.,  
129 2012). Therefore, we also quantified  $S_A$  and  $T_A$  because these are adaptive parameters (Malone et al.,  
130 2012; Reisman et al., 2005; Malone and Bastian, 2010) that could be indirectly altered by our spatial and  
131 temporal feedback even if subjects in these groups were not explicitly instructed to modify them.

132  $S_A$  quantifies differences between the legs in where they oscillate with respect to the body. The oscillation  
133 of each leg was computed as the ratio between two distances: step position ( $\alpha$ ) and stride length ( $\gamma$ ) (i.e.,  
134 anterior-posterior distance from foot position at heel strike to ipsilateral foot position at toe off). Thus,  $S_A$   
135 (legs' orientation asymmetry) was computed as the difference between these ratios when taking a step with  
136 the slow leg (i.e., slow leg leading) vs. the fast leg (see Eq. 3).

$$S_A = \frac{\alpha_s}{\gamma_s} - \frac{\alpha_f}{\gamma_f} \quad (3)$$

137 In the temporal domain,  $T_A$  quantified the difference in double support times (i.e., period during which  
138 both legs are on the ground) when taking a step with the fast leg ( $DS_s$ ) or slow leg ( $DS_f$ ), respectively  
139 (see Eq. 4). In other words,  $DS_s$  is defined as the time from fast heel strike to slow toe off and  $DS_f$  as the  
140 time from slow heel strike to fast toe off.

---

$$T_A = DS_s - DS_f \quad (4)$$

141 Lastly, we computed gait parameters defined as  $S_{nA}$  and  $T_{nA}$ , to test the specificity of our feedback.  
142 Namely, it has been previously observed that these parameters do not change as subjects walk in the  
143 split-belt environment (Malone et al., 2012; Reisman et al., 2005; Yokoyama et al., 2018). Thus, these  
144 measures are thought to simply reflect the speed difference between the legs, and hence, we expected that  
145 our feedback would not alter them. Specifically,  $S_{nA}$  quantifies the difference between the fast and slow  
146 leg's ranges of motion  $\gamma_f$  and  $\gamma_s$ . Formally expressed as:

$$S_{nA} = \frac{\gamma_f - \gamma_s}{\gamma_f + \gamma_s} \quad (5)$$

147 The non-adaptive measure in the temporal domain  $T_{nA}$  quantifies the difference between the slow and  
148 fast leg's stance time durations (which is defined as the interval when the foot is in contact with the ground),  
149 which we labeled as  $ST_s$  and  $ST_f$ , respectively. Formally expressed as:

$$T_{nA} = \frac{ST_s - ST_f}{T_{stride}} \quad (6)$$

### 150 2.3.2 Outcome measures

151 We computed *steady state* and *after-effects* to respectively characterize the adaptation and recalibration of  
152 walking in the spatial and temporal domains. Both of these outcome measures were computed for each gait  
153 parameter described in the previous section. *Steady state* was used to characterize the spatial and temporal  
154 features of the adapted motor pattern once subjects reached a plateau during split-belt walking. *Steady state*  
155 was computed as the averaged of the last 40 strides during the Adaptation phase, except for the very last  
156 5 strides to exclude transient steps when subjects were told to hold on to the handrail prior to stopping  
157 the treadmill. *After-effects* were used to characterize the recalibration of subjects' internal representation  
158 of the environment (Roemmich and Bastian, 2015) leading to gait changes that were sustained following  
159 split-belt walking compared to baseline spatial and temporal gait features. *After-effects* were computed  
160 as the averaged value for each gait parameter over the first thirty strides of post-adaptation. We used 30  
161 strides, rather than only the initial 1 to 5 strides, because we were interested in characterizing long lasting  
162 after-effects (Long et al., 2015; Mawase et al., 2017; Roemmich and Bastian, 2015). We removed baseline  
163 biases from both measures by subtracting the baseline values for each gait parameter averaged over the last  
164 40 strides during baseline (minus the very last transient 5 strides). This was done to exclude individual  
165 biases before aggregating subjects' outcome measures in every group.

## 166 2.4 Statistical analysis

167 We performed separate two-way repeated measures ANOVAs (factors: group and epoch) comparing the  
168 control group to either the temporal or spatial feedback groups. This was done to determine the effect of  
169 experimentally altering either spatial or temporal measures during split-belt walking on outcome measures



170 in both domains. When main effects of group or epoch were found ( $p < 0.05$ ), we used Fisher's LSD  
171 *post-hoc* testing to assess if main effects were driven by differences between the control group and feedback  
172 group in either domain. We applied a Bonferroni correction to account for 2 comparisons of interest  
173 resulting in a significance level set to  $\alpha = 0.025$ . We selected to do our analysis with unbiased data (i.e.,  
174 subject-specific baseline bias removed) to reduce inter-subject variability due to distinct baseline biases and  
175 focus on group effects due to the distinct experimental manipulations. Lastly, we performed independent  
176 sample t-tests to determine if *steady state* or *after-effects* were significantly different from baseline. We  
177 applied Bonferroni corrections to account for 4 comparisons of interest (baseline vs. steady state and  
178 baseline vs. after-effects for each of the experimentally targeted  $S_{out}$  and  $T_{out}$  parameters) setting the  
179 significance level to  $\alpha = 0.0125$ . For all other parameters, we set the significance level to  $\alpha = 0.025$  to  
180 account for only 2 comparisons of interest (baseline vs. after-effects in the spatial and temporal domains).  
181 This was done since we were primarily interested in the impact of the experimental manipulation on the  
182 *after-effects* of the parameters that were not explicitly targeted with the visual feedback.

### 3 RESULTS

183 *Confirmation of results supporting dissociable representation of spatial and temporal walking features.*

184 Spatial and temporal gait features adapted and recalibrated independently when feedback was used to  
185 alter the spatial control of the limb. This is indicated by the group differences qualitatively observed in the  
186  $S_{out}$ 's time courses during Adaptation and Post-adaptation (left panel in Figure 2A and 2B, respectively)  
187 contrasting the overlapping time courses of  $T_{out}$  in the control group (red trace) and spatial feedback group  
188 (blue trace) (right panel in Figures 2A and 2B). Accordingly, we found a significant group effect on  $S_{out}$   
189 ( $p = 0.0039$ ), but not a group ( $p = 0.3748$ ) or group by epoch interaction effect on  $T_{out}$  ( $p = 0.2293$ ).  
190 *Post-hoc* analysis indicated that the spatial feedback reduced the steady state of  $S_{out}$  relative to the control  
191 group ( $S \rightarrow S : p = 0.0021$ ); such that the steady state values reached by the spatial feedback group  
192 were not significantly different from zero ( $p = 0.0481$ ), whereas those of the control group differed from  
193 zero ( $p = 0.0004$ ). This indicated that individuals in the spatial feedback group were able to maintain  
194 their baseline  $S_{out}$  values with the visual feedback on this metric. In contrast, the steady state values of  
195  $T_{out}$  were significantly different from zero in both groups (control group:  $p < 0.0001$ ; spatial feedback  
196 group:  $p = 0.0004$ ). The dissociation between spatial and temporal control was also shown by the  
197 after-effects of  $S_{out}$  and  $T_{out}$  in the control vs. spatial feedback groups (Figure 2B). *Post-hoc* analysis  
198 indicated that the spatial feedback group had reduced after-effects of  $S_{out}$  compared to the control group  
199 ( $S \rightarrow S : p = 0.0159$ ) and that only the control group had after-effects different from zero (control  
200 group:  $p = 0.0003$ ; spatial feedback group:  $p = 0.0164$ ). Conversely,  $T_{out}$  was once again not qualitatively  
201 different between the groups and the after-effects were non-significantly different from zero on either  
202 group (control group:  $p = 0.4235$ ; spatial feedback group:  $p = 0.1023$ ). In sum, spatial feedback had  
203 a domain-specific effect: it altered the adaptation and recalibration of  $S_{out}$  (targeted spatial parameter)  
204 without modifying the adaptation and aftereffects of step time ( $T_{out}$ ).

205 The dissociation in adaptation and recalibration of spatial and temporal representations of walking was  
206 also supported by the analysis of spatial and temporal features known to be adapted by the split-belt task,  
207 but not directly targeted by our feedback. Namely, the spatial feedback also modified the Adaptation  
208 and Post-adaptation time courses of the legs' orientation asymmetry quantified by  $S_A$ , which is expected  
209 given its relation to  $S_{out}$ . Note that the time courses of  $S_A$  for the spatial feedback group (blue trace)  
210 and control group (red trace) do not overlap during Adaptation and Post-adaptation (left panel Figure  
211 3A and 3B). In contrast, the time courses of double support asymmetry ( $T_A$ ) were not altered by the

212 spatial feedback, as shown by the overlap of  $T_A$  values during Adaptation and Post-adaptation of the  
213 temporal feedback and control groups (right panel Figure 3A and 3B). Consistently, we found a significant  
214 group effect in  $S_A$  ( $p = 0.0091$ ) and a non-significant group ( $p = 0.8679$ ) or group by epoch interaction  
215 ( $p = 0.2229$ ) in  $T_A$ . *Post-hoc* analyses revealed that between group differences in  $S_A$  were driven by the  
216 significantly different  $S_A$ 's steady state ( $S \rightarrow S_A : p = 0.0177$ ) and trending differences in  $S_A$ 's after-  
217 effects ( $S \rightarrow S_A : p = 0.0358$ ); such that after-effects were significant in the control group ( $p = 0.0009$ )  
218 but not in the spatial feedback group ( $p = 0.0542$ ). Conversely, after-effects in double support asymmetry  
219 ( $T_A$ ) were significantly different from zero in all groups (control group:  $p = 0.0044$ ; spatial feedback  
220 group:  $p = 0.0007$ ). These results reiterated that changes in the spatial domain did not modify the temporal  
221 control of the limb in the temporal domain, replicating previous findings (Malone et al., 2012; Long et al.,  
222 2016).

223 *New evidence for interdependent representations of spatial and temporal walking features.*

224 Interestingly, we found that spatial and temporal gait features were not independent in their adaptation  
225 and recalibration when feedback was used to alter the temporal control of the limb. This is indicated by  
226 the qualitative differences between the time courses of  $T_{out}$  and  $S_{out}$  during the Adaptation (Figure 4A)  
227 and Post-adaptation phases (Figure 4B). Namely, the control group (red traces) and temporal feedback  
228 group (yellow traces) are different in both spatial and temporal parameters. Consistently, we found a  
229 significant group effect on  $S_{out}$  ( $p = 0.0005$ ) and  $T_{out}$  ( $p = 0.0034$ ). *Post-hoc* analyses revealed that the  
230  $T_{out}$ 's steady state was significantly different from zero in the control ( $p = 0.0004$ ) and temporal feedback  
231 group ( $p = 0.0092$ ). Thus, subjects in the temporal feedback group did not fully maintained the baseline  
232 values of  $T_{out}$ , even if they were able to use the visual feedback to significantly reduce the  $T_{out}$  steady state  
233 during split-belt walking relative to the control group ( $T \rightarrow T : p < 0.0001$ ). While the temporal feedback  
234 group was designed to alter  $T_{out}$ , we did not anticipate a reduction in the  $S_{out}$ 's steady state relative to the  
235 control group ( $T \rightarrow S : p = 0.0027$ ) because this parameter was not directly targeted by the feedback. The  
236 interdependence between spatial and temporal domains was also shown by the analysis of after-effects  
237 in Post-adaptation (Figure 4B). *Post-hoc* analyses indicated that temporal feedback did not change the  
238 recalibration of  $T_{out}$  ( $T \rightarrow T : p = 0.4663$ ), but altered the recalibration of  $S_{out}$  ( $T \rightarrow S : p = 0.0010$ ).  
239 The non-significant effect on the recalibration of  $T_{out}$  was expected given that after-effects in this parameter  
240 are very short lived resulting in  $T_{out}$  after-effect values that are non-significantly different from zero (control  
241 group:  $p = 0.4235$ ; temporal feedback group:  $p = 0.8550$ ). In contrast, both groups had after-effects in  
242  $S_{out}$  that were significantly different from zero (control group:  $p = 0.0003$ ; temporal feedback group:  
243  $p = 0.0021$ ), but they were unexpectedly smaller in the temporal feedback group compared to the control  
244 group. In sum, the temporal feedback impact on adaptation and recalibration of  $S_{out}$  (spatial parameter)  
245 indicated an interdependence between the spatial and temporal control of the limb.

246 The possible interdependence in space and time was further supported by the analysis of spatial and  
247 temporal features known to be adapted by the split-belt task, but not directly targeted by our feedback.  
248 Namely, the temporal feedback also modified the Adaptation and Post-adaptation time courses of the legs'  
249 orientation asymmetry, quantified by  $S_A$ , which is a spatial measure related to step position. Note that the  
250 time courses of  $S_A$  for the temporal feedback group (yellow trace) and control group (red trace) do not  
251 overlap during Adaptation and Post-adaptation (left panel Figure 5A and 5B). In contrast, the time courses  
252 of double support asymmetry ( $T_A$ ) were not altered by the temporal feedback, as shown by the overlap of  
253  $T_A$  values during Adaptation and Post-adaptation of the temporal feedback and control groups (right panel  
254 Figure 5A and 5B). Consistently, we found a group effect in  $S_A$  ( $p = 0.0029$ ) and a non-significant group  
255 ( $p = 0.8151$ ) or group by epoch interaction ( $p = 0.3189$ ) in  $T_A$ . *Post-hoc* analyses revealed that these

256 effects were driven by group differences in  $S_A$ 's steady state ( $T \rightarrow S_A : p = 0.0138$ ) and  $S_A$ 's after-effects  
257 ( $T \rightarrow S_A : p = 0.0163$ ). Surprisingly, we did not find differences on  $T_A$ 's steady state and after-effects,  
258 which we expected given the relation between  $T_A$  and the temporal measure ( $T_{out}$ ) directly altered with the  
259 temporal feedback. Thus, after-effects in  $S_A$  and  $T_A$  were significantly different from zero in all groups  
260 (control group:  $S_A : p = 0.0009$  and  $T_A : p = 0.0044$ ; temporal feedback group:  $S_A : p = 0.0080$  and  
261  $T_A : p = 0.0009$ ), but only those of  $S_A$  were reduced in the temporal feedback group compared to controls.  
262 In sum, these results indicate that temporal feedback did not have a ubiquitous effect in all gait parameters,  
263 but it did alter the adaptation and recalibration of the legs' orientation, which also characterizes the spatial  
264 control of the limb in locomotion.

265 *Temporal feedback modified the split-belt task to a greater extent than the spatial feedback.*

266 Surprisingly, temporal feedback altered the difference in stance times between the legs ( $T_{nA}$ ), whereas the  
267 spatial feedback did not. This was unexpected given previous literature indicating that  $S_{nA}$  and  $T_{nA}$  do not  
268 change as subjects walk in the split-belt environment (Malone et al., 2012; Reisman et al., 2005; Yokoyama  
269 et al., 2018). Thus, we anticipated that either type of feedback (spatial or temporal) would not alter these  
270 "non-adaptive" gait features. Qualitatively, we observed that this was the case for the spatial ( $S_{nA}$ ), but not  
271 for the temporal ( $T_{nA}$ ) "non-adaptive" parameter (Figure 6A). Note that  $S_{nA}$  has the same time course for  
272 both groups, whereas  $T_{nA}$  has a different time course for the control group (red trace) and the temporal  
273 feedback group (yellow trace). Consistently, we found a significant group effect ( $p = 0.0030$ ) and group  
274 by epoch interaction ( $p = 0.0047$ ) in  $T_{nA}$ , whereas a non-significant group ( $p = 0.3860$ ) or group by  
275 epoch interaction effect ( $p = 0.3719$ ) in  $S_{nA}$ . *Post-hoc* analysis revealed that the temporal feedback group  
276 reached a significantly lower steady state when compared to the control group ( $T \rightarrow T_{nA} : p < 0.0001$ ).  
277 Conversely, the spatial feedback group exhibited the non-adaptive behavior of these parameters  $S_{nA}$  and  
278  $T_{nA}$  that we anticipated. Namely, the time courses of  $S_{nA}$  (Figure 6B, left panel) and  $T_{nA}$  (Figure 6B,  
279 right panel) were overlapping in these two groups. This similarity is substantiated by the the non-significant  
280 group effect ( $S_{nA} : p = 0.2338$  and  $T_{nA} : p = 0.3002$ ) or group by epoch interaction ( $S_{nA} : p = 0.7452$   
281 and  $T_{nA} : p = 0.8163$ ) in the non-adaptive spatial and temporal parameter. In sum, feedback modifying the  
282 adaptation of spatial and temporal gait features had a distinct effect on "non-adaptive" temporal parameters  
283 thought to only depend on the speed difference between the legs in the split-belt task.

## 4 DISCUSSION

### 284 4.1 Summary

285 Our study confirms previous results suggesting that there are internal representations of space and time  
286 for predictive control of movement. We replicated previous results showing that altering the recalibration  
287 in the spatial domain does not impact the temporal domain. However, we also observed that the opposite  
288 was not true. That is, explicitly reducing the recalibration in the temporal domain altered movement control  
289 in space, suggesting some level of interdependence between these two domains. Interestingly, double  
290 support asymmetry was consistently corrected across the distinct spatio-temporal perturbations that subjects  
291 experienced, whereas spatial asymmetries were not. This indicates that correcting asymmetries in space  
292 and time is prioritized differently by the motor system. Our results are of translational interest because  
293 clinical populations often have greater deficits in either the spatial or the temporal control of the limb and  
294 our findings suggest that they may not be treated in isolation.



---

## 295 4.2 Separate representations for predictive control of movements in space and time

296 We find that adaptation of movements to a novel walking situation results in the recalibration of internal  
297 representations for predictive control of locomotion; which are expressed as robust after-effects in temporal  
298 and spatial movement features. This is consistent with the idea that the motor system forms internal  
299 representations of space (Marigold and Drew, 2017) and time (Avraham et al., 2017; Breska and Ivry,  
300 2018; Drew and Marigold, 2015) for predictive motor control. Several behavioral studies suggest separate  
301 recalibration of these internal representations of space and time in locomotion because spatial and timing  
302 measures exhibit different adaptation rates in the mature motor system (Malone and Bastian, 2010;  
303 Darmohray et al., 2019) throughout development (Vasudevan et al., 2011; Patrick et al., 2014) or healthy  
304 aging (Sombric et al., 2017). Spatial and temporal recalibration also have distinct generalization patterns  
305 across walking environments (Torres-Oviedo and Bastian, 2010; Mariscal et al., 2018) and most importantly,  
306 altering the adaptation of spatial features does not modify the adaptation and recalibration of temporal ones,  
307 as shown by us and others (Malone et al., 2012; Long et al., 2016). This idea of separate representations  
308 of space and time in locomotion is also supported by clinical and neurophysiological studies indicating  
309 that different neural structures might contribute to the control (Rybak et al., 2006; Lafreniere-Roula and  
310 McCrea, 2005) and adaptation (Vasudevan et al., 2011; Choi et al., 2009; Statton et al., 2018) of the spatial  
311 and temporal control of the limb in locomotion.

## 312 4.3 Hierarchic control of timing leads to interdependent adaptation of movements in 313 space and time

314 Nonetheless, we also found that explicit control of step timing modifies the adaptation and recalibration  
315 of movements in space. This result directly contradicts the dissociable adaptation of spatial and temporal  
316 features upon explicitly modifying the adaptation of step position (spatial parameter) (Malone et al., 2012;  
317 Long et al., 2016). We find two possible explanations to reconcile these findings. First, there might be a  
318 hierarchical relationship between the spatial and temporal control of the limb, such that timing cannot be  
319 manipulated without obstructing the adaptation of spatial features. We believe that this type of hierarchical  
320 organization is not exclusive to explicit control, but it is also applicable to implicit control of the limb in  
321 space and time. This is supported by a recent study indicating that lesions to interpose cerebellar nuclei  
322 altering the adaptation of double support asymmetry (temporal parameter) also reduced the after-effects of  
323 spatial features (Darmohray et al., 2019), whereas the recalibration of spatial features can be halted without  
324 modifying the temporal ones (Darmohray et al., 2019). Future studies are needed to determine if similar  
325 results would be observed in human bipedal locomotion. This type of hierarchical organization suggests  
326 that the execution of spatial and temporal control of the limb can be encoded by separate interneuronal  
327 networks (Rybak et al., 2006; Lafreniere-Roula and McCrea, 2005), but the volitional recruitment of those  
328 networks cannot occur in isolation. Second, it is possible that the observed interdependence arose as a  
329 byproduct of how we tested it. Namely, it remains an open question if our findings result from altering  
330 step time, or similar interdependence would be observed if we had manipulated other temporal measures,  
331 such as double support asymmetry. More specifically, our feedback on step time inadvertently reduced  
332 the stance time asymmetry associated to split-belt walking. The stance time asymmetry is thought to be  
333 critical for forcing subjects to adjust their gait during split-belt walking (Reisman et al., 2005). Therefore,  
334 subjects in the temporal feedback group might have reduced the adaptation of spatial parameters because  
335 the "perturbation" inducing their update was reduced. In sum, future work is needed to determine the  
336 generality of temporal measures influencing spatial ones, however our study provides initial evidence for  
337 interdependence.

#### 338 4.4 Relevance of double support symmetry over spatial asymmetries

339 We demonstrated that double support symmetry (i.e.,  $T_A$ ) is recovered in all groups, regardless of the  
340 task. This is in accordance with multiple observations that individuals consistently reduce double support  
341 asymmetries induced by split-belt walking since very early age (Patrick et al., 2014) or after lesions  
342 to cerebral (Reisman et al., 2007) or cerebellar regions (Vasudevan et al., 2011). Only children with  
343 hemispherectomies, where half of the cerebrum is missing, do not correct double support asymmetry when  
344 this is augmented (Choi et al., 2009). The adaptation and after-effects of double support were surprising  
345 to us because previous work showed that halting the adaptation of step position ( $S_{out} \approx 0$ ) limited the  
346 correction of spatial errors (defined as  $S_A$ ) (Malone et al., 2012). In an analogous manner, we anticipated  
347 that preventing the adaptation of step times ( $T_{out} \approx 0$ ) during split-belt walking was going to limit the  
348 adaptation of double support asymmetry (i.e., temporal error (Malone et al., 2012)). However, we observed  
349 that individuals prioritize differently the correction of spatial and temporal asymmetries: they minimize  
350 temporal asymmetries, but not spatial ones. This might be because double support time is the transition  
351 period when the body mass is transferred from one leg to the other, which is demanding in terms of energy  
352 expenditure (Perry, 1992). Therefore, double support symmetry might be critical for efficient body transfer  
353 between the limbs (Kuo et al., 2005; Ruina et al., 2005). Taken together our results suggests that the motor  
354 system prioritizes the maintenance of double support symmetry, which might be critical for balance control  
355 in bipedal locomotion.

#### 356 4.5 Explicit vs. implicit processes in locomotor adaptation

357 Our study contributes to recent efforts to unveil the potential interaction between explicit corrections and  
358 implicit sensorimotor recalibration in locomotion (Statton et al., 2016; Roemmich et al., 2016; Long et al.,  
359 2016; Malone et al., 2012; Maeda et al., 2017). Interestingly, we found that preventing foot adjustments  
360 during split-belt walking significantly reduced post-adaptation effects compared to the control group. This  
361 was also observed when using explicit corrections to reduce the adjustment of foot placement in response  
362 to a 2:1 speed belt ratio (Malone et al., 2012) but not in response to a larger 3:1 speed belt ratio (Long  
363 et al., 2016). Notably, after-effects following the 3:1 perturbation were equally large with or without  
364 explicit corrections during the split condition (Long et al., 2016). One interpretation for these results is  
365 that the implicit sensorimotor adaptation in walking is scaled with perturbation magnitude. Thus, explicit  
366 corrections preventing foot adjustments in the split condition will have a lesser impact on after-effects  
367 induced by large perturbations. This interpretation is consistent with the proportional relation between  
368 perturbation size and after-effects upon experiencing unexpected constant forces (Yokoyama et al., 2018;  
369 Green et al., 2010; Torres-Oviedo and Bastian, 2012), contrasting the fixed amount of implicit sensorimotor  
370 recalibration upon visuomotor perturbations (Kim et al., 2018).

#### 371 4.6 Study implications

372 We provide a novel approach for manipulating stance time, which is a major deficit in stroke survivors  
373 (Patterson et al., 2008). It would be interesting to determine if this type of feedback overground or on  
374 a regular treadmill could lead to gait improvements post-stroke as those induced by split-belt walking  
375 (Reisman et al., 2013; Lewek et al., 2018). Our results also indicate that manipulating the adaptation  
376 of movements in the temporal domain alters movements in the spatial domain, suggesting that spatial  
377 and temporal deficits in individuals with cortical lesions (Finley et al., 2015; Malone and Bastian, 2014)  
378 cannot be treated in complete isolation. Only the correction of timing asymmetries through error-based  
379 sensorimotor adaptation could occur while preventing the adaptation of spatial ones, as we did in the spatial

380 feedback group. However, the opposite is not possible, at least with the temporal feedback task that we  
381 used.

## CONFLICT OF INTEREST STATEMENT

382 The authors declare that the research was conducted in the absence of any commercial or financial  
383 relationships that could be construed as a potential conflict of interest.

## AUTHOR CONTRIBUTIONS

384 M.G. and N.V. equally contributed to data acquisition and processing (Gonzalez-Rubio et al., 2019). They  
385 also contributed in the interpretation of the data and final approval of the version to be published, and  
386 agreement to be accountable for all aspects of the work. G.T-O. contributions include conception and design  
387 of the work, analysis of the data, writing a complete draft of the manuscript, revising work for important  
388 intellectual content, final approval of the version to be published, and agreement to be accountable for all  
389 aspects of the work.

## FUNDING

390 The project was funded by National Science Foundation (NSF1535036), and American Heart Association  
391 (AHA 15SDG25710041).

## ACKNOWLEDGMENTS

392 The authors acknowledge the valuable input from Pablo Iturralde and Carly Sombric.

## DATA AVAILABILITY STATEMENT

393 The datasets generated and analyzed for this study can be found in the *Figshare* repository [[https://](https://figshare.com/articles/ExplicitTemporal_SpatialModulations_mat/8145962)  
394 [figshare.com/articles/ExplicitTemporal\\_SpatialModulations\\_mat/8145962](https://figshare.com/articles/ExplicitTemporal_SpatialModulations_mat/8145962)]

## REFERENCES

- 395 Afzal, M. R., Oh, M. K., Lee, C. H., Park, Y. S., and Yoon, J. (2015). A Portable Gait Asymmetry  
396 Rehabilitation System for Individuals with Stroke Using a Vibrotactile Feedback. *BioMed Research*  
397 *International* 2015. doi:10.1155/2015/375638
- 398 Avraham, G., Leib, R., Pressman, A., Simo, L. S., Karniel, A., Shmuelof, L., et al. (2017). State-Based  
399 Delay Representation and Its Transfer from a Game of Pong to Reaching and Tracking. *eNeuro* 4, 1–30.  
400 doi:10.1523/eneuro.0179-17.2017
- 401 Breska, A. and Ivry, R. B. (2018). Double Dissociation of Single-Interval and Rhythmic Temporal  
402 Prediction in Cerebellar Degeneration and Parkinson's Disease. *Proceedings of the National Academy of*  
403 *Sciences* 115, 12283–12288. doi:10.1073/pnas.1810596115
- 404 Choi, J. T., Vining, E. P., Reisman, D. S., and Bastian, A. J. (2009). Walking Flexibility after  
405 Hemispherectomy: Split-belt Treadmill Adaptation and Feedback Control. *Brain* 132, 722–733.  
406 doi:10.1093/brain/awn333
- 407 Darmohray, D. M., Jacobs, J. R., Marques, H. G., and Carey, M. R. (2019). Spatial and Temporal  
408 Locomotor Learning in Mouse Cerebellum. *Neuron* 102, 217–231. doi:10.1016/j.neuron.2019.01.038

- 409 Drew, T. and Marigold, D. S. (2015). Taking the Next Step: Cortical Contributions to the Control of  
410 Locomotion. *Current Opinion in Neurobiology* doi:10.1016/j.conb.2015.01.011
- 411 Finley, J. M., Long, A., Bastian, A. J., and Torres-Oviedo, G. (2015). Spatial and Temporal  
412 Control Contribute to Step Length Asymmetry during Split-Belt Adaptation and Hemiparetic Gait.  
413 *Neurorehabilitation and Neural Repair* 29, 786–795. doi:10.1177/1545968314567149
- 414 Gonzalez-Rubio, M., Velasquez, N. F., and Torres-Oviedo, G. (2019). Data from:  
415 ExplicitTemporal&SpatialModulations. *Figshare Repository* doi:10.6084/m9.figshare.8145962.v1
- 416 Green, D. A., Bunday, K. L., Bowen, J., Carter, T., and Bronstein, A. M. (2010). What Does Autonomic  
417 Arousal Tell Us about Locomotor Learning? *Neuroscience* 170, 42–53. doi:10.1016/j.neuroscience.  
418 2010.06.079
- 419 Kim, H. E., Morehead, J. R., Parvin, D. E., Moazzezi, R., and Ivry, R. B. (2018). Invariant Errors Reveal  
420 Limitations in Motor Correction Rather than Constraints on Error Sensitivity. *Communications Biology*  
421 1. doi:10.1038/s42003-018-0021-y
- 422 Krishnan, V., Khoo, I., Marayong, P., DeMars, K., and Cormack, J. (2016). Gait Training in Chronic  
423 Stroke Using Walk-Even Feedback Device: A Pilot Study. *Neuroscience Journal* 2016, 1–8. doi:10.  
424 1155/2016/6808319
- 425 Kuo, A. D., Donelan, J. M., and Ruina, A. (2005). Energetic Consequences of Walking Like an  
426 Inverted Pendulum : Step-to-Step Transitions Energetic Consequences of Walking Like an Inverted  
427 Pendulum : Step-to-Step Transitions. *Excercise and Sport Sciences Revies* , 88–97doi:10.1097/  
428 00003677-200504000-00006
- 429 Lafreniere-Roula, M. and McCrea, D. A. (2005). Deletions of Rhythmic Motoneuron Activity During  
430 Fictive Locomotion and Scratch Provide Clues to the Organization of the Mammalian Central Pattern  
431 Generator. *Journal of Neurophysiology* 94, 1120–1132. doi:10.1152/jn.00216.2005
- 432 Lewek, M. D., Braun, C. H., Wutzke, C. J., and Giuliani, C. (2018). The Role of Movement Errors in  
433 Modifying Spatiotemporal Gait Asymmetry Post-Stroke: A Randomized Controlled Trial. *Clinical*  
434 *Rehabilitation* 32, 161–172. doi:10.1177/0269215517723056
- 435 Long, A. W., Finley, J. M., and Bastian, A. J. (2015). A Marching-Walking Hybrid Induces Step Length  
436 Adaptation and Transfers to Natural Walking. *Journal of Neurophysiology* doi:10.1152/jn.00779.2014
- 437 Long, A. W., Roemmich, R. T., and Bastian, A. J. (2016). Blocking Trial-by-Trial Error Correction does  
438 not Interfere with Motor Learning in Human Walking. *Journal of Neurophysiology* , 2341–2348doi:10.  
439 1152/jn.00941.2015
- 440 Maeda, R. S., O'Connor, S. M., Donelan, J. M., and Marigold, D. S. (2017). Foot Placement Relies  
441 on State Estimation during Visually Guided Walking. *Journal of Neurophysiology* 117, 480–491.  
442 doi:10.1152/jn.00015.2016
- 443 Malone, L. A. and Bastian, A. J. (2010). Thinking About Walking: Effects of Conscious Correction Versus  
444 Distraction on Locomotor Adaptation. *Journal of Neurophysiology* , 1954–1962doi:10.1152/jn.00832.  
445 2009
- 446 Malone, L. A. and Bastian, A. J. (2014). Spatial and Temporal Asymmetries in Gait Predict Split-belt  
447 Adaptation Behavior in Stroke. *Neurorehabilitation and Neural Repair* 28, 230–240. doi:10.1177/  
448 1545968313505912
- 449 Malone, L. A., Bastian, A. J., and Torres-Oviedo, G. (2012). How does the Motor System Correct for  
450 Errors in Time and Space during Locomotor Adaptation? *Journal of Neurophysiology* 108, 672–683.  
451 doi:10.1152/jn.00391.2011
- 452 Marigold, D. S. and Drew, T. (2017). Posterior Parietal Cortex Estimates the Relationship Between Object  
453 and Body Location during Locomotion. *eLife* 6, 1–24. doi:10.7554/elife.28143



- 454 Mariscal, D. M., Iturralde, P. A., and Torres-Oviedo, G. (2018). Augmenting Cognitive Load during  
455 Split-Belt Walking Increases the Generalization of Motor Memories Across Walking Contexts. *bioRxiv*  
456 doi:<http://dx.doi.org/10.1101/470930>
- 457 Mawase, F., Bar-Haim, S., and Shmuelof, L. (2017). Formation of Long-Term Locomotor Memories Is  
458 Associated with Functional Connectivity Changes in the Cerebellar–Thalamic–Cortical Network. *The*  
459 *Journal of Neuroscience* 37, 349–361. doi:10.1523/jneurosci.2733-16.2017
- 460 Mawase, F., Shmuelof, L., Bar-Haim, S., and Karniel, A. (2014). Savings in Locomotor Adaptation  
461 Explained by Changes in Learning Parameters Following Initial Adaptation. *Journal of Neurophysiology*  
462 111, 1444–1454. doi:10.1152/jn.00734.2013
- 463 Patrick, S. K., Musselman, K. E., Tajino, J., Ou, H.-C., Bastian, A. J., and Yang, J. F. (2014). Prior  
464 Experience but Not Size of Error Improves Motor Learning on the Split-Belt Treadmill in Young  
465 Children. *PLoS ONE* 9, e93349. doi:10.1371/journal.pone.0093349
- 466 Patterson, K. K., Parafianowicz, I., Danells, C. J., Closson, V., Verrier, M. C., Staines, W. R., et al. (2008).  
467 Gait Asymmetry in Community-Ambulating Stroke Survivors. *Archives of Physical Medicine and*  
468 *Rehabilitation* 89, 304–310. doi:10.1016/j.apmr.2007.08.142
- 469 Perry, J. (1992). Total Limb Function. In *Gait Analysis: Normal and Pathological Function* (Thorofare,  
470 NJ: Slack Incorporated), chap. 9. 149–167
- 471 Reisman, D. S., Block, H. J., and Bastian, A. J. (2005). Interlimb Coordination During Locomotion: What  
472 Can be Adapted and Stored? *Journal of Neurophysiology* 94, 2403–2415. doi:10.1152/jn.00089.2005
- 473 Reisman, D. S., McLean, H., Keller, J., Danks, K. A., and Bastian, A. J. (2013). Repeated Split-belt  
474 Treadmill Training Improves Poststroke Step Length Asymmetry. *Neurorehabilitation and Neural*  
475 *Repair* 27, 460–468. doi:10.1177/1545968312474118
- 476 Reisman, D. S., Wityk, R., Silver, K., and Bastian, A. J. (2007). Locomotor Adaptation on a Split-belt  
477 Treadmill can Improve Walking Symmetry Post-Stroke. *Brain* doi:10.1093/brain/awm035
- 478 Roemmich, R. T. and Bastian, A. J. (2015). Two Ways to Save a Newly Learned Motor Pattern. *Journal of*  
479 *Neurophysiology* 113, 3519–3530. doi:10.1152/jn.00965.2014
- 480 Roemmich, R. T., Long, A. W., and Bastian, A. J. (2016). Seeing the Errors You Feel Enhances Locomotor  
481 Performance but Not Learning. *Current Biology* doi:10.1016/j.cub.2016.08.012
- 482 Ruina, A., Bertram, J. E. A., and Srinivasan, M. (2005). A Collisional Model of the Energetic Cost of  
483 Support Work Qualitatively Explains Leg Sequencing in Walking and Galloping, Pseudo-elastic Leg  
484 Behavior in Running and the Walk-to-Run Transition. *Journal of Theoretical Biology* 237, 170–192.  
485 doi:10.1016/j.jtbi.2005.04.004
- 486 Rybak, I. A., Shevtsova, N. A., Lafreniere-Roula, M., and McCrea, D. A. (2006). Modelling Spinal  
487 Circuitry Involved in Locomotor Pattern Generation: Insights from Deletions during Fictive Locomotion.  
488 *Journal of Physiology* 577, 617–639. doi:10.1113/jphysiol.2006.118703
- 489 Sombric, C. J., Harker, H. M., Sparto, P. J., and Torres-Oviedo, G. (2017). Explicit Action Switching  
490 Interferes with the Context-Specificity of Motor Memories in Older Adults. *Frontiers in Aging*  
491 *Neuroscience* 9. doi:10.3389/fnagi.2017.00040
- 492 Statton, M. A., Toliver, A., and Bastian, A. J. (2016). A Dual-Learning Paradigm can Simultaneously  
493 Train Multiple Characteristics of Walking. *Journal of Neurophysiology* 115, 2692–2700. doi:10.1152/jn.  
494 00090.2016
- 495 Statton, M. A., Vazquez, A., Morton, S. M., Vasudevan, E. V., and Bastian, A. J. (2018). Making  
496 Sense of Cerebellar Contributions to Perceptual and Motor Adaptation. *Cerebellum* 17, 111–121.  
497 doi:10.1007/s12311-017-0879-0



- 498 Torres-Oviedo, G. and Bastian, A. J. (2010). Seeing Is Believing: Effects of Visual Contextual Cues  
499 on Learning and Transfer of Locomotor Adaptation. *Journal of Neuroscience* 30, 17015–17022.  
500 doi:10.1523/JNEUROSCI.4205-10.2010
- 501 Torres-Oviedo, G. and Bastian, A. J. (2012). Natural Error Patterns Enable Transfer of Motor Learning to  
502 Novel Contexts. *Journal of Neurophysiology* doi:10.1152/jn.00570.2011
- 503 Vasudevan, E. V. L., Torres-Oviedo, G., Morton, S. M., Yang, J. F., and Bastian, J., A. (2011). Younger Is  
504 Not Always Better: Development of Locomotor Adaptation from Childhood to Adulthood. *Journal of*  
505 *Neuroscience* 31, 3055–3065. doi:10.1523/jneurosci.5781-10.2011
- 506 Vervoort, D., den Otter, A. R., Buurke, T. J. W., Vuillerme, N., Hortobágyi, T., and Lamoth, C. J. C. (2019).  
507 Effects of Aging and Task Prioritization on Split-Belt Gait Adaptation. *Frontiers in Aging Neuroscience*  
508 11, 1–12. doi:10.3389/fnagi.2019.00010
- 509 Yokoyama, H., Sato, K., Ogawa, T., Yamamoto, S. I., Nakazawa, K., and Kawashima, N. (2018).  
510 Characteristics of the Gait Adaptation Process due to Split-belt Treadmill Walking under a Wide Range  
511 of Right-left Speed Ratios in Humans. *PLoS ONE* 13, 1–14. doi:10.1371/journal.pone.0194875

## FIGURE CAPTIONS

512 Figure 1: Expected outcomes, Paradigm and Feedback Visualization. **(A)** Expected outcomes for dissociable  
513 and interdependent internal representations of space and time. If dissociable, the feedback manipulation  
514 will only affect the targeted domain without changing the other domain. For example, spatial feedback  
515 (indicated with blue outline) would alter spatial features (S) of the motor pattern while temporal ones (T)  
516 remain invariant. On the other hand, if the domains are interdependent, feedback manipulation of one  
517 domain will also alter the other domain. For example, spatial feedback modifying spatial features of the  
518 motor pattern would also change temporal ones. **(B)** Split-belt walking paradigm used in all groups. Dashed  
519 lines separate the different experimental phases. All groups experienced the same number of strides during  
520 each phase (Baseline: 150, Familiarization: 150, Adaptation: 600, and Post-adaptation: 450). The two belts  
521 moved at the same speed ( $0.75m/s$ ) during the Baseline and Familiarization phases. Only subjects in the  
522 feedback groups walked while observing their movements on a TV screen placed directly in front of them  
523 (Feedback On) during the familiarization phase. The feedback to these groups was also given during the  
524 Adaptation phase (gray shaded area) during which one belt (fast belt) moved at  $1m/s$  and the other one  
525 (slow belt) moved at  $0.5m/s$ . Finally, during Post-adaptation subjects walked again with the two belts  
526 moving at the same speed ( $0.75m/s$ ). **(C-D)** Visual feedback schematic. Schematic of the legs in the top  
527 row illustrate the step position (e.g.,  $\alpha_f$  and  $\alpha_s$ ) and step time (e.g.,  $t_s$ ), which were the walking features  
528 used in the spatial and temporal feedback tasks, respectively. Bottom rows in panel C and D illustrate the  
529 screen shots observed by individuals in the spatial feedback group (Panel C) or in the temporal feedback  
530 group (Panel D). Blue rectangles indicated the target step position or step time value that subjects had to  
531 achieve with each leg. These rectangles turned green when subjects met the desired step position or step  
532 time values and red when they did not. Yellow lines indicated either the step position value (Panel C) or the  
533 step time value (Panel D) at heel strike (HS) when taking a step with the right or left leg (e.g., left leg's  
534 step position is shown in the screen shot #1). In the example shown, the step position was correct for the  
535 right leg but not for the left leg. The light grey progression bars showed in real-time either the the distance  
536 from the ankle to the hip markers as subjects swing the leg forward (Panel C) or the time that the subject  
537 had spent on the standing leg since it hit the ground (Panel D).

538 Figure 2: Adaptation and Post-adaptation of the parameters  $S_{out}$  (targeted) and  $T_{out}$  in the spatial feedback  
539 and control groups. Stride-by-stride time courses show the effect of altering step positions in the Adaptation

540 (Panel A) and Post-adaptation (Panel B) of  $S_{out}$  and  $T_{out}$ . Each data point in the time courses represents  
541 the average of five consecutive strides and shaded areas around the data points represent the standard errors.  
542 Bar plots indicate the mean average behavior in the epochs of interest (indicated with the black rectangles),  
543 gray dots indicate values for individual subjects, and vertical black lines are standard errors. Horizontal  
544 lines between bars illustrate significant differences between groups ( $p < 0.025$ ). **A)** Steady state values of  
545  $S_{out}$  and  $T_{out}$ : We found a significant group difference in  $S_{out}$ 's steady state. Colored asterisks indicate  
546 that the mean steady state for that group is significantly different from zero ( $p < 0.0125$ ). **B)** After-effect  
547 values of  $S_{out}$  and  $T_{out}$ : We found a significant group difference in  $S_{out}$ 's after-effects. Colored asterisks  
548 indicate that the mean after-effect for that group is significantly different from zero ( $p < 0.0125$ ).

549 Figure 3: Adaptation and Post-adaptation for the adaptive but non-targeted parameters  $S_A$  (leg orientation  
550 asymmetry) and  $T_A$  (double support time asymmetry) in the spatial feedback and control groups. Stride-  
551 by-stride time courses show the effect of altering the step positions in the Adaptation (Panel A) and  
552 Post-adaptation (Panel B) of  $S_A$  and  $T_A$ . Each data point in the time courses represents the average of five  
553 consecutive strides and shaded areas around the data points represent the standard errors. Bar plots indicate  
554 the mean average behavior in the epochs of interest (indicated with the black rectangles), the gray dots  
555 indicate values for individual subjects, and vertical black lines are standard errors. Horizontal lines between  
556 bars illustrate significant differences between groups ( $p < 0.025$ ). We found a significant group effect in  
557  $S_A$ . **A)** Steady States for  $S_A$  and  $T_A$ : The significant group effect on  $S_A$  was driven by differences between  
558 the spatial feedback and control group in the non-targeted spatial motor output (adaptive motor output).  
559 **B)** After-Effects values of  $S_A$  and  $T_A$ : We found significant group differences in  $S_A$ . Colored asterisks  
560 indicate after-effect values are significantly different from zero ( $p < 0.025$ ) according to *post-hoc* analysis.

561 Figure 4: Adaptation and Post-adaptation of the parameters  $S_{out}$  and  $T_{out}$  (targeted) in the temporal  
562 feedback and control groups. Stride-by-stride time courses show the effect of altering step times in the  
563 Adaptation (Panel A) and Post-adaptation (Panel B) of  $S_{out}$  and  $T_{out}$ . Each data point in the time courses  
564 represents the average of five consecutive strides and shaded areas around the data points represent the  
565 standard errors. Bar plots indicate the mean average behavior in the epochs of interest (indicated with  
566 the black rectangles), the gray dots indicate values for individual subjects, and vertical black lines are  
567 standard errors. Horizontal lines between bars illustrate significant differences between groups ( $p < 0.025$ ).  
568 There was a significant group effect on  $S_{out}$  and  $T_{out}$ . **A)** Steady States values of  $T_{out}$  and  $S_{out}$ : We found  
569 significant group differences in  $S_{out}$ 's and  $T_{out}$ 's steady state. Colored asterisks indicate that the mean  
570 steady state for that group is significantly different from zero ( $p < 0.0125$ ). **B)** After-effect values of  $T_{out}$   
571 and  $S_{out}$ : We found a significant group difference in  $S_{out}$ 's after-effects. Colored asterisks indicate that the  
572 mean after-effect for that group is significantly different from zero ( $p < 0.0125$ ).

573 Figure 5: Adaptation and Post-adaptation for the adaptive but non-targeted parameters  $S_A$  (leg orientation  
574 asymmetry) and  $T_A$  (double support time asymmetry) in the temporal feedback and control groups. Stride-  
575 by-stride time courses show the effect of altering step times in the Adaptation (Panel A) and Post-adaptation  
576 (Panel B) of  $S_A$  and  $T_A$ . Each data point in the time courses represents the average of five consecutive  
577 strides and shaded areas around the data points represent the standard errors. Bar plots indicate the mean  
578 average behavior in the epochs of interest (indicated with the black rectangles), the gray dots indicate  
579 values for individual subjects, and vertical black lines are standard errors. Horizontal lines between bars  
580 illustrate significant differences between groups ( $p < 0.025$ ). There was a significant group effect in  $S_A$ ,  
581 but no in  $T_A$ . **A)** Steady State values of  $T_A$  and  $S_A$ : The significant group effect on  $S_A$  was driven by  
582 differences between the temporal feedback and control group in the non-targeted spatial motor output  
583 (adaptive motor output). **B)** After-Effects of  $T_A$  and  $S_A$ : We found a significant group difference in  $S_A$ .

---

584 Colored asterisks indicate after-effect values are significantly different from zero ( $p < 0.025$ ) according to  
585 *post-hoc* analysis.

586 Figure 6: Adaptation of  $S_{nA}$  and  $T_{nA}$  measures that are non-adaptive and non-targeted parameters in  
587 temporal feedback and control group (Panel A) and spatial feedback and control group (Panel B). Stride-by-  
588 stride time courses show the effect of altering the step times or step positions on "non-adaptive" temporal  
589 and spatial measures ( $S_{nA}$  and  $T_{nA}$ ) during Adaptation. Each data point in the time courses represents the  
590 average of five consecutive strides and shaded areas around the data points represent the standard errors.  
591 Bar plots indicate the mean average behavior in the epochs of interest (indicated with the black rectangles),  
592 the gray dots indicate values for individual subjects, and vertical black lines are standard errors. Horizontal  
593 lines between bars illustrate significant differences between groups ( $p < 0.025$ ). **A)** Steady State values of  
594  $T_{nA}$  and  $S_{nA}$ : We found a significant group effect and group by epoch interaction driven by differences  
595 between the temporal feedback and control group in the non-targeted temporal motor output (adaptive  
596 motor output). **B)** Steady State values of  $S_{nA}$  and  $T_{nA}$ : We did not find a significant group effect or group  
597 by epoch interaction for the spatial feedback and control group in the parameters of interest.

## FIGURES

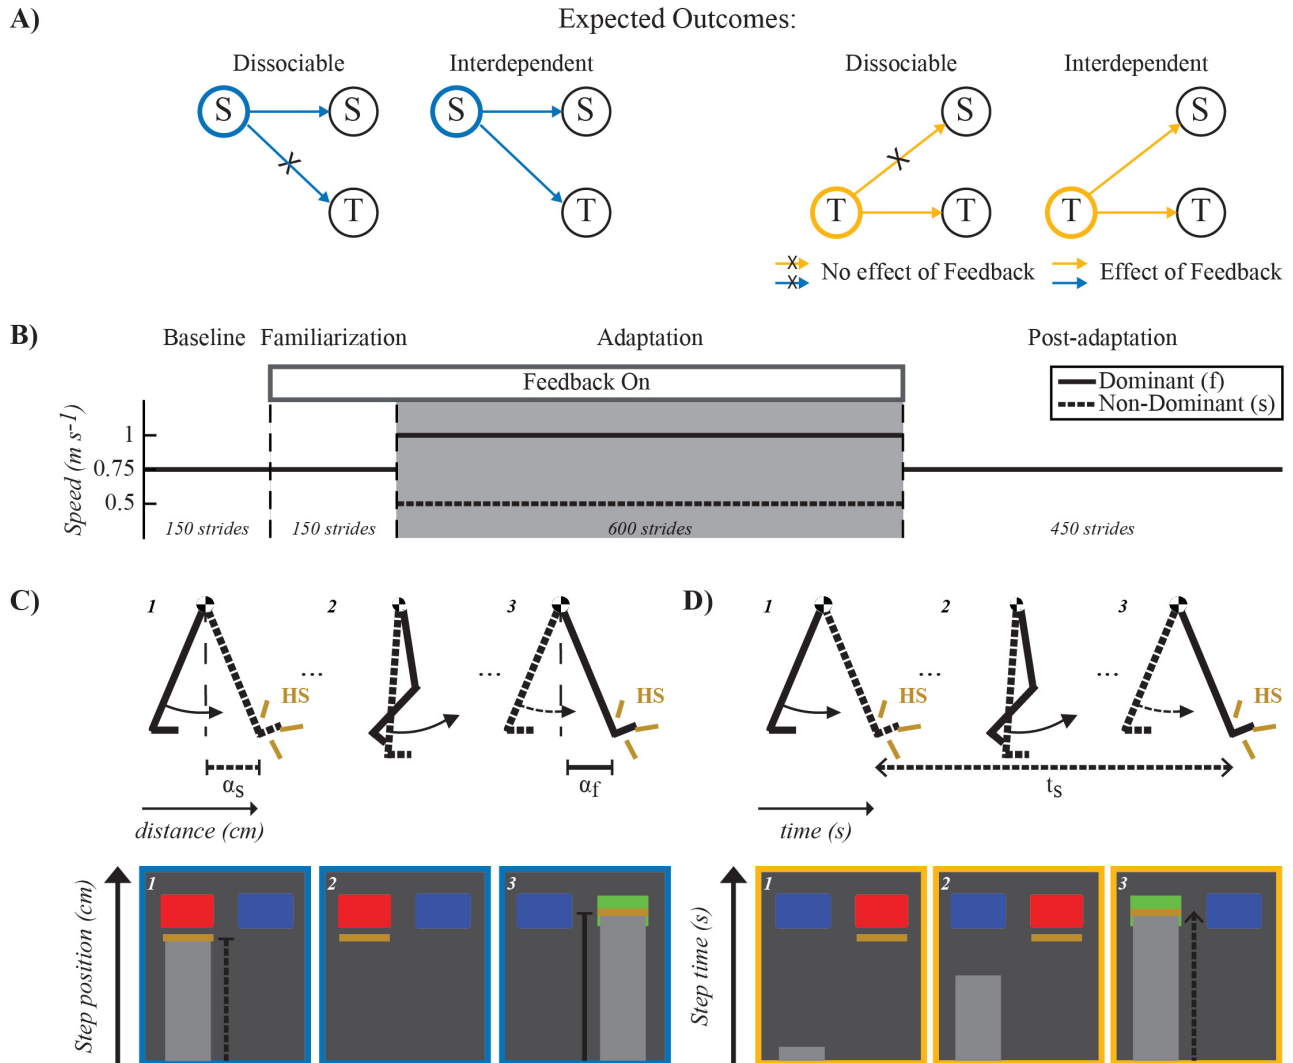

**Figure 1.**

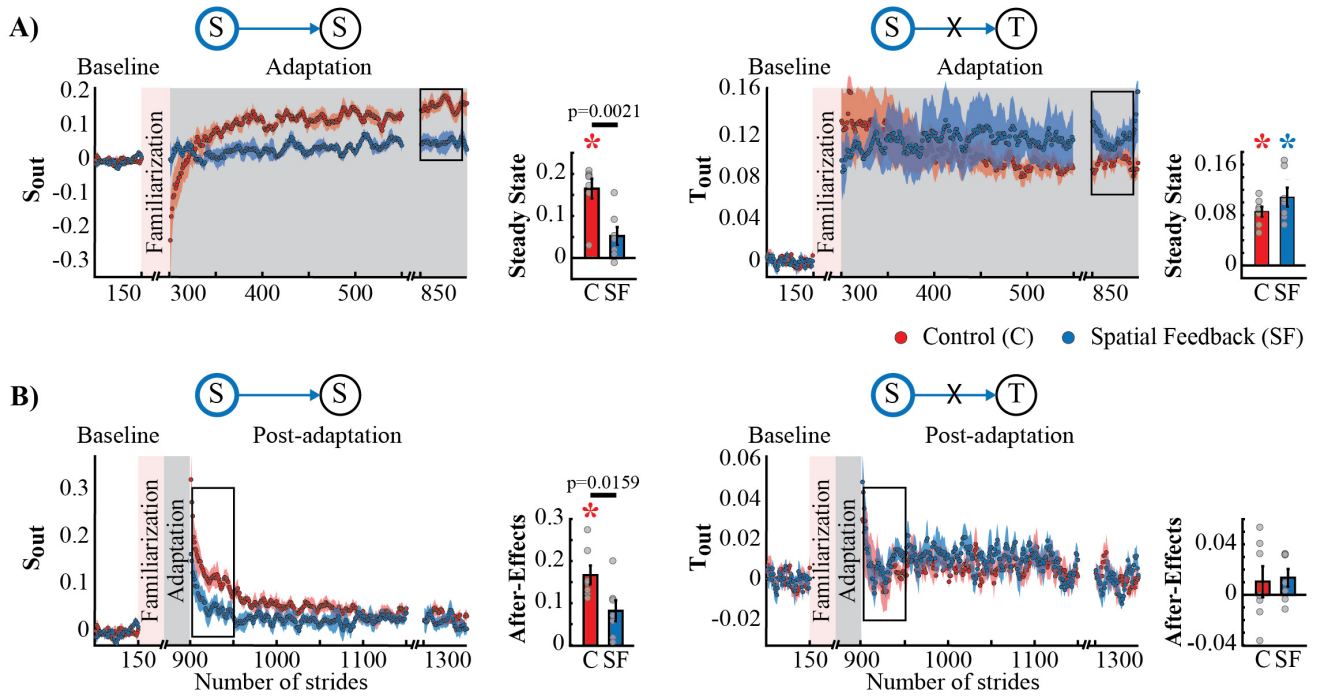

**Figure 2.**

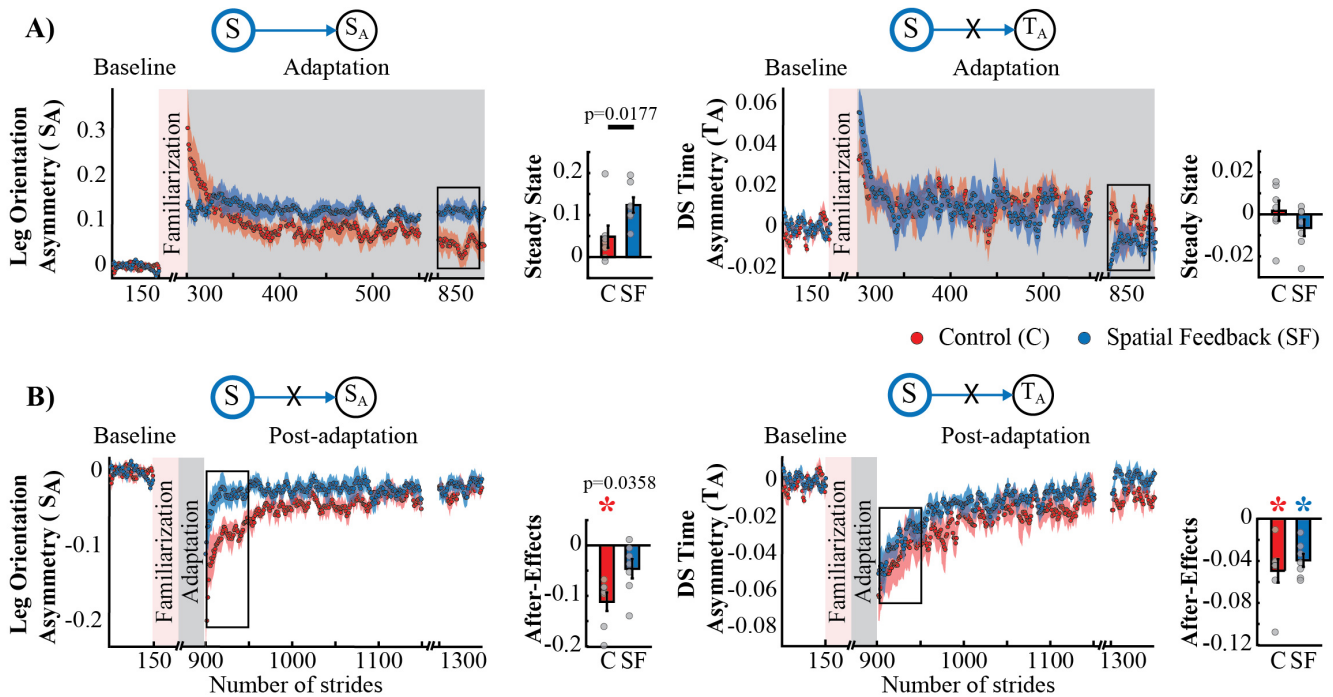

**Figure 3.**



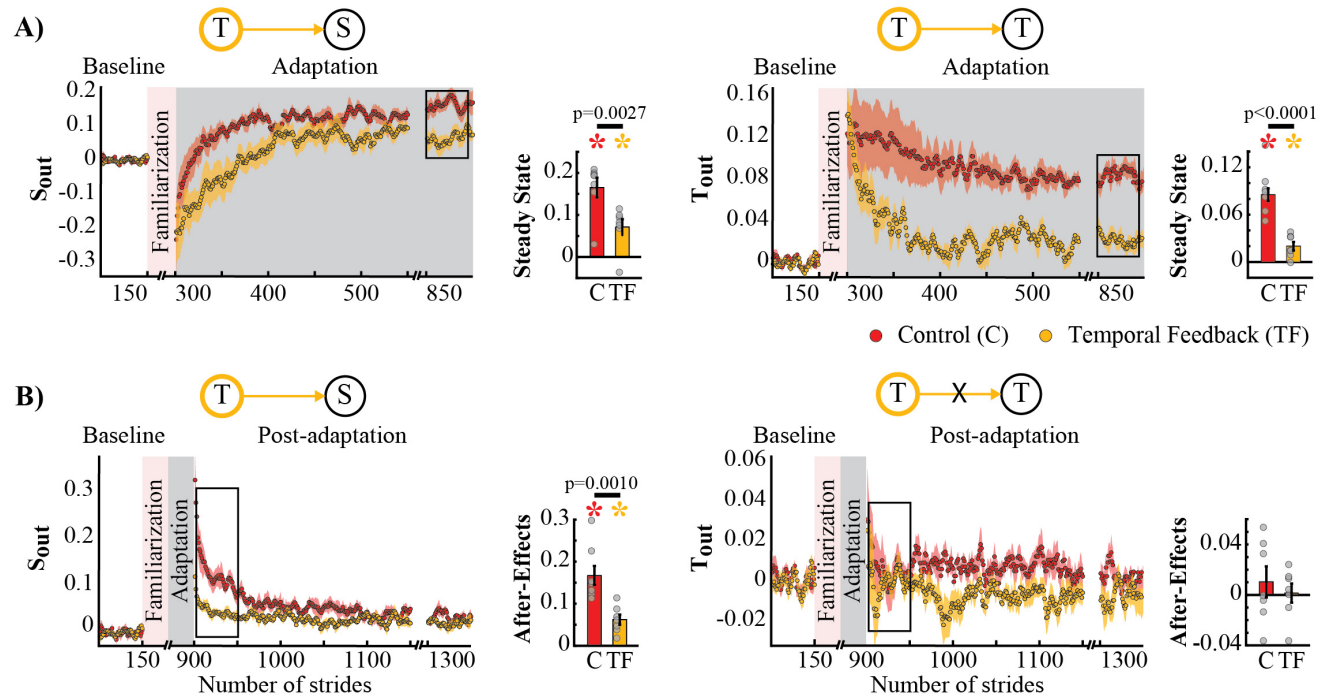

**Figure 4.**

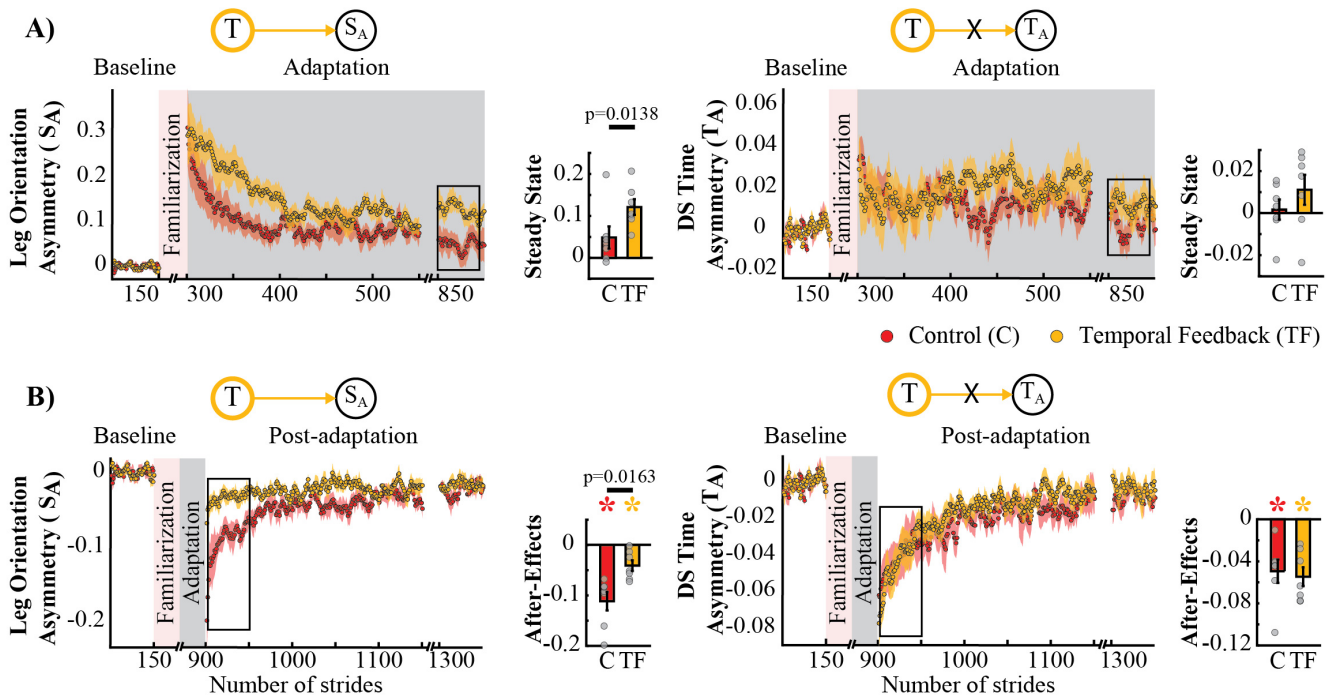

**Figure 5.**

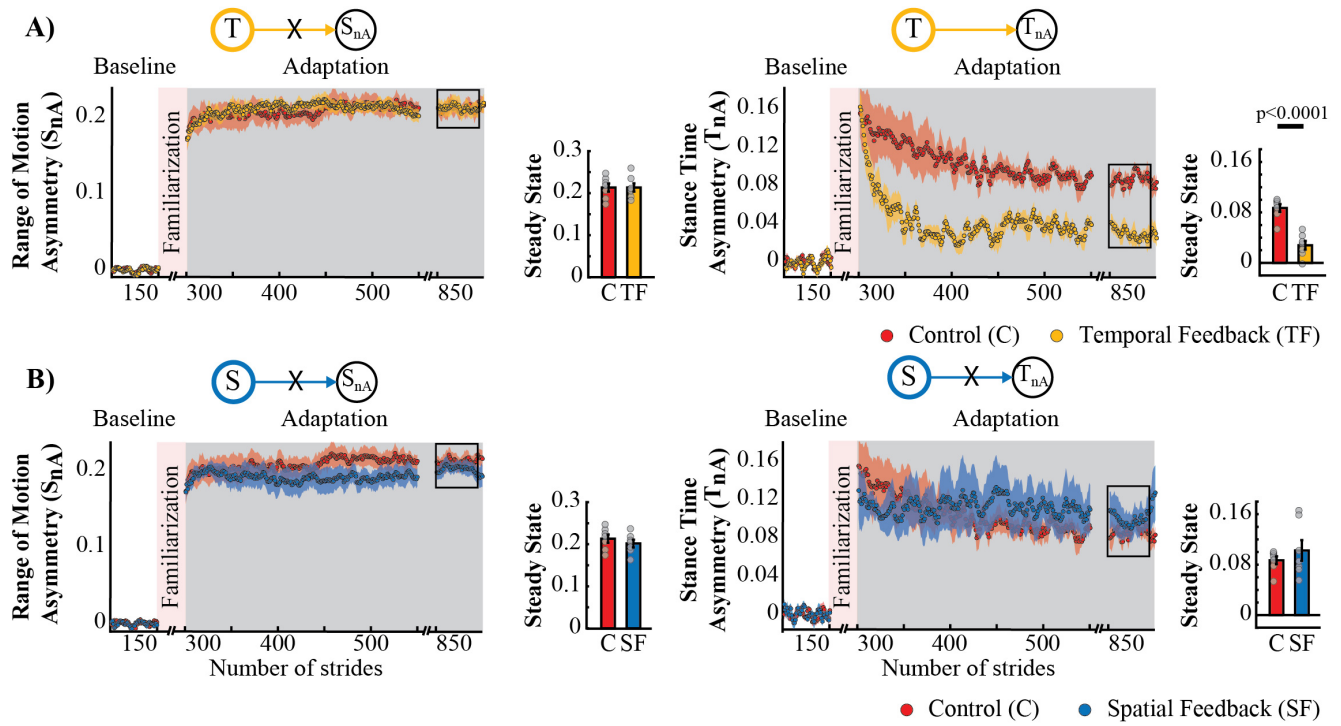

**Figure 6.**
